# Supplementary material for: Thalassospiramide G, a New γ-Amino-Acid-Bearing Peptide from the Marine Bacterium Thalassospira sp
Source: MDPI journal article supplement (doi:10.3390/md11030611), 2013-02-26
Supplement: s2 [file s2]

marinedrugs-11-00611-s001.mol
  corina  04161404063D 1   1.00000     0.00000 
CORINA 3.49 0023  12.04.2013
 48 49  0  0  0  0  0  0  0  0999 V2000
   -2.9738    0.6357   -0.4943 C   0  0  0  0  0  0  0  0  0  0  0  0
   -2.4668   -0.8019   -0.3634 C   0  0  0  0  0  0  0  0  0  0  0  0
   -1.7672   -1.2160   -1.6596 C   0  0  0  0  0  0  0  0  0  0  0  0
   -1.2602   -2.6536   -1.5287 C   0  0  0  0  0  0  0  0  0  0  0  0
   -0.5605   -3.0676   -2.8248 C   0  0  0  0  0  0  0  0  0  0  0  0
   -0.0536   -4.5053   -2.6939 C   0  0  0  0  0  0  0  0  0  0  0  0
    0.6356   -4.9131   -3.9706 C   0  0  0  0  0  0  0  0  0  0  0  0
    1.8465   -5.4112   -3.9310 C   0  0  0  0  0  0  0  0  0  0  0  0
    2.4832   -5.7397   -2.6052 C   0  0  0  0  0  0  0  0  0  0  0  0
    2.9520   -7.1719   -2.6142 C   0  0  0  0  0  0  0  0  0  0  0  0
    4.0120   -9.0823   -1.5353 C   0  0  0  0  0  0  0  0  0  0  0  0
    3.5562   -7.6900   -1.5266 N   0  0  0  0  0  0  0  0  0  0  0  0
    2.6786   -9.5318    0.5293 C   0  0  0  0  0  0  0  0  0  0  0  0
    4.0711   -9.6086   -0.0999 C   0  0  0  0  0  0  0  0  0  0  0  0
    1.5889  -10.2094    2.6440 N   0  0  0  0  0  0  0  0  0  0  0  0
    2.7102  -10.1623    1.8977 C   0  0  0  0  0  0  0  0  0  0  0  0
    0.2389  -11.3053    4.3368 C   0  0  0  0  0  0  0  0  0  0  0  0
    1.6196  -10.8224    3.9742 C   0  0  0  0  0  0  0  0  0  0  0  0
   -1.2467  -12.8781    5.4577 C   0  0  0  0  0  0  0  0  0  0  0  0
    0.0885  -12.3380    5.1896 N   0  0  0  0  0  0  0  0  0  0  0  0
   -2.0819  -13.1077    7.7585 C   0  0  0  0  0  0  0  0  0  0  0  0
   -1.2574  -13.5429    6.8101 C   0  0  0  0  0  0  0  0  0  0  0  0
   -2.9280  -13.3156   10.0397 N   0  0  0  0  0  0  0  0  0  0  0  0
   -2.0924  -13.7566    9.0786 C   0  0  0  0  0  0  0  0  0  0  0  0
   -4.6046  -12.3530   11.8127 O   0  0  0  0  0  0  0  0  0  0  0  0
   -3.9534  -13.2847   12.2390 C   0  0  0  0  0  0  0  0  0  0  0  0
   -2.9384  -13.9618   11.3544 C   0  0  0  0  0  0  0  0  0  0  0  0
   -5.0936  -13.1884   14.5609 C   0  0  0  0  0  0  0  0  0  0  0  0
   -4.1476  -13.7355   13.5685 C   0  0  0  0  0  0  0  0  0  0  0  0
   -4.9206  -13.9594   15.7207 C   0  0  0  0  0  0  0  0  0  0  0  0
   -3.9469  -14.9011   15.4558 N   0  0  0  0  0  0  0  0  0  0  0  0
   -3.4911  -14.7733   14.1951 C   0  0  0  0  0  0  0  0  0  0  0  0
   -6.0271  -12.1561   14.5400 C   0  0  0  0  0  0  0  0  0  0  0  0
   -6.7762  -11.8911   15.6657 C   0  0  0  0  0  0  0  0  0  0  0  0
   -6.6024  -12.6476   16.8155 C   0  0  0  0  0  0  0  0  0  0  0  0
   -5.6873  -13.6771   16.8469 C   0  0  0  0  0  0  0  0  0  0  0  0
   -1.3470  -14.6910    9.3028 O   0  0  0  0  0  0  0  0  0  0  0  0
   -1.6070  -13.9047    4.3820 C   0  0  0  0  0  0  0  0  0  0  0  0
   -0.7214  -15.0224    4.4745 O   0  0  0  0  0  0  0  0  0  0  0  0
   -0.7370  -10.7646    3.8611 O   0  0  0  0  0  0  0  0  0  0  0  0
    2.0844   -9.7883    5.0016 C   0  0  0  0  0  0  0  0  0  0  0  0
    1.1119   -8.6072    5.0123 C   0  0  0  0  0  0  0  0  0  0  0  0
    2.1224  -10.4303    6.3900 C   0  0  0  0  0  0  0  0  0  0  0  0
    3.7446  -10.6274    2.3273 O   0  0  0  0  0  0  0  0  0  0  0  0
    4.9825   -8.8139    0.6616 O   0  0  0  0  0  0  0  0  0  0  0  0
    5.4045   -9.1592   -2.1646 C   0  0  0  0  0  0  0  0  0  0  0  0
    6.3391   -8.4607   -1.3396 O   0  0  0  0  0  0  0  0  0  0  0  0
    2.7855   -7.8583   -3.6001 O   0  0  0  0  0  0  0  0  0  0  0  0
  1  2  1  0      
  2  3  1  0      
  3  4  1  0      
  4  5  1  0      
  5  6  1  0      
  6  7  1  0      
  7  8  2  0      
  8  9  1  0      
 10  9  1  0      
 11 12  1  0      
 12 10  1  0      
 13 14  1  0      
 14 11  1  0      
 15 16  1  0      
 16 13  1  0      
 17 18  1  0      
 18 15  1  0      
 19 20  1  0      
 20 17  1  0      
 21 22  2  0      
 22 19  1  0      
 23 24  1  0      
 24 21  1  0      
 25 26  2  0      
 26 27  1  0      
 27 23  1  0      
 28 29  1  0      
 29 26  1  0      
 28 30  2  0      
 30 31  1  0      
 31 32  1  0      
 32 29  2  0      
 28 33  1  0      
 33 34  2  0      
 34 35  1  0      
 35 36  2  0      
 36 30  1  0      
 24 37  2  0      
 19 38  1  0      
 38 39  1  0      
 17 40  2  0      
 18 41  1  0      
 41 42  1  0      
 41 43  1  0      
 16 44  2  0      
 14 45  1  0      
 11 46  1  0      
 46 47  1  0      
 10 48  2  0      
M  END
$$$$
