# Supplementary material for: Thalassospiramide G, a New γ-Amino-Acid-Bearing Peptide from the Marine Bacterium Thalassospira sp
Source: MDPI journal article supplement (doi:10.3390/md11030611), 2013-02-26
Supplement: s3 [file s3]

marinedrugs-11-00611-s001.mol
  ChemDraw03251423572D

 48 49  0  0  0  0  0  0  0  0999 V2000
  -10.4853   -0.2063    0.0000 C   0  0  0  0  0  0  0  0  0  0  0  0
   -9.7708    0.2062    0.0000 C   0  0  0  0  0  0  0  0  0  0  0  0
   -9.0563   -0.2063    0.0000 C   0  0  0  0  0  0  0  0  0  0  0  0
   -8.3418    0.2062    0.0000 C   0  0  0  0  0  0  0  0  0  0  0  0
   -7.6274   -0.2063    0.0000 C   0  0  0  0  0  0  0  0  0  0  0  0
   -6.9129    0.2062    0.0000 C   0  0  0  0  0  0  0  0  0  0  0  0
   -6.1984   -0.2063    0.0000 C   0  0  0  0  0  0  0  0  0  0  0  0
   -5.3734   -0.2063    0.0000 C   0  0  0  0  0  0  0  0  0  0  0  0
   -4.6590    0.2062    0.0000 C   0  0  0  0  0  0  0  0  0  0  0  0
   -3.9445   -0.2063    0.0000 C   0  0  0  0  0  0  0  0  0  0  0  0
   -2.5155   -0.2063    0.0000 C   0  0  0  0  0  0  0  0  0  0  0  0
   -3.2300    0.2062    0.0000 N   0  0  0  0  0  0  0  0  0  0  0  0
   -1.0866   -0.2063    0.0000 C   0  0  0  0  0  0  0  0  0  0  0  0
   -1.8011    0.2062    0.0000 C   0  0  0  0  0  0  0  0  0  0  0  0
    0.3423   -0.2063    0.0000 N   0  0  0  0  0  0  0  0  0  0  0  0
   -0.3721    0.2062    0.0000 C   0  0  0  0  0  0  0  0  0  0  0  0
    1.7713   -0.2063    0.0000 C   0  0  0  0  0  0  0  0  0  0  0  0
    1.0568    0.2062    0.0000 C   0  0  0  0  0  0  0  0  0  0  0  0
    3.2002   -0.2063    0.0000 C   0  0  0  0  0  0  0  0  0  0  0  0
    2.4858    0.2062    0.0000 N   0  0  0  0  0  0  0  0  0  0  0  0
    4.6292   -0.2063    0.0000 C   0  0  0  0  0  0  0  0  0  0  0  0
    3.9147    0.2062    0.0000 C   0  0  0  0  0  0  0  0  0  0  0  0
    6.0581   -0.2063    0.0000 N   0  0  0  0  0  0  0  0  0  0  0  0
    5.3436    0.2062    0.0000 C   0  0  0  0  0  0  0  0  0  0  0  0
    7.4871   -1.0313    0.0000 O   0  0  0  0  0  0  0  0  0  0  0  0
    7.4871   -0.2063    0.0000 C   0  0  0  0  0  0  0  0  0  0  0  0
    6.7726    0.2062    0.0000 C   0  0  0  0  0  0  0  0  0  0  0  0
    8.9160   -0.2063    0.0000 C   0  0  0  0  0  0  0  0  0  0  0  0
    8.2015    0.2062    0.0000 C   0  0  0  0  0  0  0  0  0  0  0  0
    9.5291    0.3458    0.0000 C   0  0  0  0  0  0  0  0  0  0  0  0
    9.1935    1.0995    0.0000 N   0  0  0  0  0  0  0  0  0  0  0  0
    8.3731    1.0132    0.0000 C   0  0  0  0  0  0  0  0  0  0  0  0
    9.0875   -1.0132    0.0000 C   0  0  0  0  0  0  0  0  0  0  0  0
    9.8722   -1.2682    0.0000 C   0  0  0  0  0  0  0  0  0  0  0  0
   10.4853   -0.7161    0.0000 C   0  0  0  0  0  0  0  0  0  0  0  0
   10.3137    0.0908    0.0000 C   0  0  0  0  0  0  0  0  0  0  0  0
    5.3436    1.0313    0.0000 O   0  0  0  0  0  0  0  0  0  0  0  0
    3.2002   -1.0313    0.0000 C   0  0  0  0  0  0  0  0  0  0  0  0
    3.9147   -1.4438    0.0000 O   0  0  0  0  0  0  0  0  0  0  0  0
    1.7713   -1.0313    0.0000 O   0  0  0  0  0  0  0  0  0  0  0  0
    1.0568    1.0313    0.0000 C   0  0  0  0  0  0  0  0  0  0  0  0
    0.3423    1.4438    0.0000 C   0  0  0  0  0  0  0  0  0  0  0  0
    1.7713    1.4438    0.0000 C   0  0  0  0  0  0  0  0  0  0  0  0
   -0.3721    1.0313    0.0000 O   0  0  0  0  0  0  0  0  0  0  0  0
   -1.8011    1.0313    0.0000 O   0  0  0  0  0  0  0  0  0  0  0  0
   -2.5155   -1.0313    0.0000 C   0  0  0  0  0  0  0  0  0  0  0  0
   -1.8011   -1.4438    0.0000 O   0  0  0  0  0  0  0  0  0  0  0  0
   -3.9445   -1.0313    0.0000 O   0  0  0  0  0  0  0  0  0  0  0  0
  1  2  1  0      
  2  3  1  0      
  3  4  1  0      
  4  5  1  0      
  5  6  1  0      
  6  7  1  0      
  7  8  2  0      
  8  9  1  0      
 10  9  1  0      
 11 12  1  0      
 12 10  1  0      
 13 14  1  0      
 14 11  1  0      
 15 16  1  0      
 16 13  1  0      
 17 18  1  0      
 18 15  1  0      
 19 20  1  0      
 20 17  1  0      
 21 22  2  0      
 22 19  1  0      
 23 24  1  0      
 24 21  1  0      
 25 26  2  0      
 26 27  1  0      
 27 23  1  0      
 28 29  1  0      
 29 26  1  0      
 28 30  2  0      
 30 31  1  0      
 31 32  1  0      
 32 29  2  0      
 28 33  1  0      
 33 34  2  0      
 34 35  1  0      
 35 36  2  0      
 36 30  1  0      
 24 37  2  0      
 19 38  1  6      
 38 39  1  0      
 17 40  2  0      
 18 41  1  1      
 41 42  1  0      
 41 43  1  0      
 16 44  2  0      
 14 45  1  1      
 11 46  1  6      
 46 47  1  0      
 10 48  2  0      
M  END
