# Supplementary material for: Thalassospiramide G, a New γ-Amino-Acid-Bearing Peptide from the Marine Bacterium Thalassospira sp
Source: MDPI journal article supplement (doi:10.3390/md11030611), 2013-02-26
Supplement: s4 [file s4]

marinedrugs-11-00611-s002.mol
  corina  04161404073D 1   1.00000     0.00000 
CORINA 3.49 0023  12.04.2013
 68 69  0  0  0  0  0  0  0  0999 V2000
    0.4336    5.3125    0.8613 C   0  0  0  0  0  0  0  0  0  0  0  0
    0.0755    3.8932    0.9208 N   0  0  0  0  0  0  0  0  0  0  0  0
   -3.0261   -0.0225    1.7777 O   0  0  0  0  0  0  0  0  0  0  0  0
    2.0559    4.8261   -0.9756 C   0  0  0  0  0  0  0  0  0  0  0  0
    1.8889    5.4528    0.4102 C   0  0  0  0  0  0  0  0  0  0  0  0
    3.8353    4.6075   -2.6798 N   0  0  0  0  0  0  0  0  0  0  0  0
    3.4572    5.0719   -1.4724 C   0  0  0  0  0  0  0  0  0  0  0  0
    4.3777    4.1594   -5.2665 O   0  0  0  0  0  0  0  0  0  0  0  0
    5.2103    4.8082   -4.6693 C   0  0  0  0  0  0  0  0  0  0  0  0
    5.1976    4.8464   -3.1628 C   0  0  0  0  0  0  0  0  0  0  0  0
    6.0947    5.5475   -6.8153 C   0  0  0  0  0  0  0  0  0  0  0  0
    6.1471    5.4950   -5.3529 N   0  0  0  0  0  0  0  0  0  0  0  0
    8.2005    6.7706   -7.1534 O   0  0  0  0  0  0  0  0  0  0  0  0
   10.5227    4.8187   -6.0886 O   0  0  0  0  0  0  0  0  0  0  0  0
    8.0753    4.1491   -7.1932 C   0  0  0  0  0  0  0  0  0  0  0  0
    6.7776    4.3298   -7.3850 C   0  0  0  0  0  0  0  0  0  0  0  0
   10.7149    5.3541   -7.1706 C   0  0  0  0  0  0  0  0  0  0  0  0
   10.6919    4.5111   -8.4104 C   0  0  0  0  0  0  0  0  0  0  0  0
   10.1386    3.1719   -8.1265 N   0  0  0  0  0  0  0  0  0  0  0  0
    8.8496    3.0392   -7.7292 C   0  0  0  0  0  0  0  0  0  0  0  0
   -1.2125    3.5172    0.7934 C   0  0  0  0  0  0  0  0  0  0  0  0
   -1.5809    2.0573    0.8546 C   0  0  0  0  0  0  0  0  0  0  0  0
   -3.0295    1.9119    0.6914 N   0  0  0  0  0  0  0  0  0  0  0  0
   -3.6589    0.8304    1.1920 C   0  0  0  0  0  0  0  0  0  0  0  0
   -5.4456    1.9586    3.0538 O   0  0  0  0  0  0  0  0  0  0  0  0
   -5.8583    1.8622    1.6891 C   0  0  0  0  0  0  0  0  0  0  0  0
   -5.1491    0.6809    1.0240 C   0  0  0  0  0  0  0  0  0  0  0  0
   -7.3666   -0.6853    0.3297 O   0  0  0  0  0  0  0  0  0  0  0  0
   -6.7156   -1.1742    1.2287 C   0  0  0  0  0  0  0  0  0  0  0  0
   -5.5882   -0.5683    1.6509 N   0  0  0  0  0  0  0  0  0  0  0  0
   -7.4181   -5.1290    0.9933 C   0  0  0  0  0  0  0  0  0  0  0  0
   -8.5293   -4.1418    0.7443 C   0  0  0  0  0  0  0  0  0  0  0  0
   -8.4445   -2.9255    1.2234 C   0  0  0  0  0  0  0  0  0  0  0  0
   -7.1674   -2.4591    1.8735 C   0  0  0  0  0  0  0  0  0  0  0  0
   10.9343    6.6953   -7.2174 N   0  0  0  0  0  0  0  0  0  0  0  0
   11.7261    7.3663   -8.2509 C   0  0  0  0  0  0  0  0  0  0  0  0
   10.1780    6.6405   -9.6110 C   0  0  0  0  0  0  0  0  0  0  0  0
    9.8440    5.1508   -9.5108 C   0  0  0  0  0  0  0  0  0  0  0  0
    6.7646    6.8316   -7.2917 C   0  0  0  0  0  0  0  0  0  0  0  0
    8.8416    7.6207   -6.3494 C   0  0  0  0  0  0  0  0  0  0  0  0
   10.3283    7.4869   -6.1155 C   0  0  0  0  0  0  0  0  0  0  0  0
   10.9683    8.8783   -6.0866 C   0  0  0  0  0  0  0  0  0  0  0  0
   10.4917    9.6251   -4.8675 C   0  0  0  0  0  0  0  0  0  0  0  0
   11.0814    9.3892   -3.6393 C   0  0  0  0  0  0  0  0  0  0  0  0
    9.4694   10.5492   -4.9801 C   0  0  0  0  0  0  0  0  0  0  0  0
    9.0310   11.2354   -3.8642 C   0  0  0  0  0  0  0  0  0  0  0  0
    9.6174   10.9967   -2.6298 C   0  0  0  0  0  0  0  0  0  0  0  0
   10.6463   10.0726   -2.5203 C   0  0  0  0  0  0  0  0  0  0  0  0
   -2.0750    4.3540    0.6296 O   0  0  0  0  0  0  0  0  0  0  0  0
   -1.2371   -0.1796   -0.2041 C   0  0  0  0  0  0  0  0  0  0  0  0
   -0.8631    1.3027   -0.2662 C   0  0  0  0  0  0  0  0  0  0  0  0
   -1.2841    1.8786   -1.6197 C   0  0  0  0  0  0  0  0  0  0  0  0
    0.2666    5.9391    2.2471 C   0  0  0  0  0  0  0  0  0  0  0  0
    2.7427    4.7847    1.3412 O   0  0  0  0  0  0  0  0  0  0  0  0
    1.2029    5.3506    3.1520 O   0  0  0  0  0  0  0  0  0  0  0  0
   -7.9984   -6.4072    1.6019 C   0  0  0  0  0  0  0  0  0  0  0  0
   -6.8703   -7.4094    1.8547 C   0  0  0  0  0  0  0  0  0  0  0  0
   -7.4505   -8.6876    2.4633 C   0  0  0  0  0  0  0  0  0  0  0  0
   -6.3224   -9.6898    2.7161 C   0  0  0  0  0  0  0  0  0  0  0  0
   -6.9027  -10.9680    3.3246 C   0  0  0  0  0  0  0  0  0  0  0  0
    4.2448    5.6877   -0.7858 O   0  0  0  0  0  0  0  0  0  0  0  0
    6.1296    3.7627   -2.6172 C   0  0  0  0  0  0  0  0  0  0  0  0
    7.5691    4.0706   -3.0343 C   0  0  0  0  0  0  0  0  0  0  0  0
    6.0366    3.7313   -1.0904 C   0  0  0  0  0  0  0  0  0  0  0  0
    8.3234    1.9398   -7.8271 O   0  0  0  0  0  0  0  0  0  0  0  0
    8.2305    8.5113   -5.7954 O   0  0  0  0  0  0  0  0  0  0  0  0
   10.1449    4.4697  -10.8474 C   0  0  0  0  0  0  0  0  0  0  0  0
    9.1882   11.6708   -1.5306 O   0  0  0  0  0  0  0  0  0  0  0  0
  1  2  1  0      
  4  5  1  0      
  5  1  1  0      
  6  7  1  0      
  7  4  1  0      
  8  9  2  0      
  9 10  1  0      
 10  6  1  0      
 11 12  1  0      
 12  9  1  0      
 15 16  2  0      
 16 11  1  0      
 14 17  2  0      
 17 18  1  0      
 18 19  1  0      
 19 20  1  0      
 20 15  1  0      
  2 21  1  0      
 21 22  1  0      
 22 23  1  0      
 23 24  1  0      
 24  3  2  0      
 25 26  1  0      
 27 24  1  0      
 28 29  2  0      
 29 30  1  0      
 30 27  1  0      
 31 32  1  0      
 32 33  2  0      
 33 34  1  0      
 34 29  1  0      
 17 35  1  0      
 35 36  1  0      
 37 38  1  0      
 39 13  1  0      
 13 40  1  0      
 40 41  1  0      
 41 35  1  0      
 42 43  1  0      
 43 44  1  0      
 43 45  2  0      
 45 46  1  0      
 46 47  2  0      
 47 48  1  0      
 48 44  2  0      
 21 49  2  0      
 50 51  1  0      
 51 52  1  0      
 22 51  1  0      
  1 53  1  0      
  5 54  1  0      
 53 55  1  0      
 27 26  1  0      
 31 56  1  0      
 56 57  1  0      
 57 58  1  0      
 58 59  1  0      
 59 60  1  0      
  7 61  2  0      
 10 62  1  0      
 62 63  1  0      
 62 64  1  0      
 20 65  2  0      
 11 39  1  0      
 40 66  2  0      
 41 42  1  0      
 18 38  1  0      
 38 67  1  0      
 47 68  1  0      
M  END
$$$$
