# Supplementary material for: Thalassospiramide G, a New γ-Amino-Acid-Bearing Peptide from the Marine Bacterium Thalassospira sp
Source: MDPI journal article supplement (doi:10.3390/md11030611), 2013-02-26
Supplement: s5 [file s5]

marinedrugs-11-00611-s002.mol
  ChemDraw03251423582D

 68 69  0  0  0  0  0  0  0  0999 V2000
   -3.9296    1.6500    0.0000 C   0  0  0  0  0  0  0  0  0  0  0  0
   -3.9296    0.8250    0.0000 N   0  0  0  0  0  0  0  0  0  0  0  0
   -3.2151    0.4125    0.0000 O   0  0  0  0  0  0  0  0  0  0  0  0
   -2.5006    1.6500    0.0000 C   0  0  0  0  0  0  0  0  0  0  0  0
   -3.2151    2.0625    0.0000 C   0  0  0  0  0  0  0  0  0  0  0  0
   -1.0717    1.6500    0.0000 N   0  0  0  0  0  0  0  0  0  0  0  0
   -1.7862    2.0625    0.0000 C   0  0  0  0  0  0  0  0  0  0  0  0
    0.3572    0.8250    0.0000 O   0  0  0  0  0  0  0  0  0  0  0  0
    0.3572    1.6500    0.0000 C   0  0  0  0  0  0  0  0  0  0  0  0
   -0.3572    2.0625    0.0000 C   0  0  0  0  0  0  0  0  0  0  0  0
    1.7862    1.6500    0.0000 C   0  0  0  0  0  0  0  0  0  0  0  0
    1.0717    2.0625    0.0000 N   0  0  0  0  0  0  0  0  0  0  0  0
    2.5006    0.4125    0.0000 O   0  0  0  0  0  0  0  0  0  0  0  0
    3.2151    0.8250    0.0000 O   0  0  0  0  0  0  0  0  0  0  0  0
    3.2151    1.6500    0.0000 C   0  0  0  0  0  0  0  0  0  0  0  0
    2.5006    2.0625    0.0000 C   0  0  0  0  0  0  0  0  0  0  0  0
    3.9296    0.4125    0.0000 C   0  0  0  0  0  0  0  0  0  0  0  0
    4.6441    0.8250    0.0000 C   0  0  0  0  0  0  0  0  0  0  0  0
    4.6441    1.6500    0.0000 N   0  0  0  0  0  0  0  0  0  0  0  0
    3.9296    2.0625    0.0000 C   0  0  0  0  0  0  0  0  0  0  0  0
   -4.6441    0.4125    0.0000 C   0  0  0  0  0  0  0  0  0  0  0  0
   -4.6441   -0.4125    0.0000 C   0  0  0  0  0  0  0  0  0  0  0  0
   -3.9296   -0.8250    0.0000 N   0  0  0  0  0  0  0  0  0  0  0  0
   -3.2151   -0.4125    0.0000 C   0  0  0  0  0  0  0  0  0  0  0  0
   -3.2151   -2.0625    0.0000 O   0  0  0  0  0  0  0  0  0  0  0  0
   -2.5006   -1.6500    0.0000 C   0  0  0  0  0  0  0  0  0  0  0  0
   -2.5006   -0.8250    0.0000 C   0  0  0  0  0  0  0  0  0  0  0  0
   -1.0717   -1.6500    0.0000 O   0  0  0  0  0  0  0  0  0  0  0  0
   -1.0717   -0.8250    0.0000 C   0  0  0  0  0  0  0  0  0  0  0  0
   -1.7862   -0.4125    0.0000 N   0  0  0  0  0  0  0  0  0  0  0  0
   -0.3572   -2.0625    0.0000 C   0  0  0  0  0  0  0  0  0  0  0  0
    0.3572   -1.6500    0.0000 C   0  0  0  0  0  0  0  0  0  0  0  0
    0.3572   -0.8250    0.0000 C   0  0  0  0  0  0  0  0  0  0  0  0
   -0.3572   -0.4125    0.0000 C   0  0  0  0  0  0  0  0  0  0  0  0
    3.9296   -0.4125    0.0000 N   0  0  0  0  0  0  0  0  0  0  0  0
    4.6441   -0.8250    0.0000 C   0  0  0  0  0  0  0  0  0  0  0  0
    5.3585   -0.4125    0.0000 C   0  0  0  0  0  0  0  0  0  0  0  0
    5.3585    0.4125    0.0000 C   0  0  0  0  0  0  0  0  0  0  0  0
    1.7862    0.8250    0.0000 C   0  0  0  0  0  0  0  0  0  0  0  0
    2.5006   -0.4125    0.0000 C   0  0  0  0  0  0  0  0  0  0  0  0
    3.2151   -0.8250    0.0000 C   0  0  0  0  0  0  0  0  0  0  0  0
    3.2151   -1.6500    0.0000 C   0  0  0  0  0  0  0  0  0  0  0  0
    3.9296   -2.0625    0.0000 C   0  0  0  0  0  0  0  0  0  0  0  0
    4.6441   -1.6500    0.0000 C   0  0  0  0  0  0  0  0  0  0  0  0
    3.9296   -2.8875    0.0000 C   0  0  0  0  0  0  0  0  0  0  0  0
    4.6441   -3.3000    0.0000 C   0  0  0  0  0  0  0  0  0  0  0  0
    5.3585   -2.8875    0.0000 C   0  0  0  0  0  0  0  0  0  0  0  0
    5.3585   -2.0625    0.0000 C   0  0  0  0  0  0  0  0  0  0  0  0
   -5.3585    0.8250    0.0000 O   0  0  0  0  0  0  0  0  0  0  0  0
   -6.0730   -0.4125    0.0000 C   0  0  0  0  0  0  0  0  0  0  0  0
   -5.3585   -0.8250    0.0000 C   0  0  0  0  0  0  0  0  0  0  0  0
   -5.3585   -1.6500    0.0000 C   0  0  0  0  0  0  0  0  0  0  0  0
   -4.6441    2.0625    0.0000 C   0  0  0  0  0  0  0  0  0  0  0  0
   -3.2151    2.8875    0.0000 O   0  0  0  0  0  0  0  0  0  0  0  0
   -4.6441    2.8875    0.0000 O   0  0  0  0  0  0  0  0  0  0  0  0
   -0.3572   -2.8875    0.0000 C   0  0  0  0  0  0  0  0  0  0  0  0
    0.3572   -3.3000    0.0000 C   0  0  0  0  0  0  0  0  0  0  0  0
    1.0717   -2.8875    0.0000 C   0  0  0  0  0  0  0  0  0  0  0  0
    1.7862   -3.3000    0.0000 C   0  0  0  0  0  0  0  0  0  0  0  0
    2.5006   -2.8875    0.0000 C   0  0  0  0  0  0  0  0  0  0  0  0
   -1.7862    2.8875    0.0000 O   0  0  0  0  0  0  0  0  0  0  0  0
   -0.3572    2.8875    0.0000 C   0  0  0  0  0  0  0  0  0  0  0  0
   -1.0717    3.3000    0.0000 C   0  0  0  0  0  0  0  0  0  0  0  0
    0.3572    3.3000    0.0000 C   0  0  0  0  0  0  0  0  0  0  0  0
    3.9296    2.8875    0.0000 O   0  0  0  0  0  0  0  0  0  0  0  0
    1.7862   -0.8250    0.0000 O   0  0  0  0  0  0  0  0  0  0  0  0
    6.0730    0.8250    0.0000 C   0  0  0  0  0  0  0  0  0  0  0  0
    6.0730   -3.3000    0.0000 O   0  0  0  0  0  0  0  0  0  0  0  0
  1  2  1  0      
  4  5  1  0      
  5  1  1  0      
  6  7  1  0      
  7  4  1  0      
  8  9  2  0      
  9 10  1  0      
 10  6  1  0      
 11 12  1  0      
 12  9  1  0      
 15 16  2  0      
 16 11  1  0      
 14 17  2  0      
 17 18  1  0      
 18 19  1  0      
 19 20  1  0      
 20 15  1  0      
  2 21  1  0      
 21 22  1  0      
 22 23  1  0      
 23 24  1  0      
 24  3  2  0      
 25 26  1  0      
 27 24  1  0      
 28 29  2  0      
 29 30  1  0      
 30 27  1  0      
 31 32  1  0      
 32 33  2  0      
 33 34  1  0      
 34 29  1  0      
 17 35  1  0      
 35 36  1  0      
 37 38  1  0      
 39 13  1  0      
 13 40  1  0      
 40 41  1  0      
 41 35  1  0      
 42 43  1  0      
 43 44  1  0      
 43 45  2  0      
 45 46  1  0      
 46 47  2  0      
 47 48  1  0      
 48 44  2  0      
 21 49  2  0      
 50 51  1  0      
 51 52  1  0      
 22 51  1  1      
  1 53  1  1      
  5 54  1  1      
 53 55  1  0      
 27 26  1  1      
 31 56  1  0      
 56 57  1  0      
 57 58  1  0      
 58 59  1  0      
 59 60  1  0      
  7 61  2  0      
 10 62  1  1      
 62 63  1  0      
 62 64  1  0      
 20 65  2  0      
 11 39  1  6      
 40 66  2  0      
 41 42  1  1      
 18 38  1  1      
 38 67  1  0      
 47 68  1  0      
M  END
