# Supplementary material for: Thalassospiramide G, a New γ-Amino-Acid-Bearing Peptide from the Marine Bacterium Thalassospira sp
Source: MDPI journal article supplement (doi:10.3390/md11030611), 2013-02-26
Supplement: s6 [file s6]

marinedrugs-11-00611-s003.mol
  corina  04161404073D 1   1.00000     0.00000 
CORINA 3.49 0023  12.04.2013
 60 62  0  0  0  0  0  0  0  0999 V2000
    2.5736   -0.3671    2.1283 C   0  0  0  0  0  0  0  0  0  0  0  0
    1.2556   -2.3803    1.5552 N   0  0  0  0  0  0  0  0  0  0  0  0
    2.4406   -1.8541    1.9230 C   0  0  0  0  0  0  0  0  0  0  0  0
   -0.6489   -3.1821   -0.0599 O   0  0  0  0  0  0  0  0  0  0  0  0
   -0.0099   -4.1021    0.4050 C   0  0  0  0  0  0  0  0  0  0  0  0
    1.1264   -3.8259    1.3556 C   0  0  0  0  0  0  0  0  0  0  0  0
   -1.4202   -5.6400   -0.8521 C   0  0  0  0  0  0  0  0  0  0  0  0
   -0.3161   -5.3716    0.0716 N   0  0  0  0  0  0  0  0  0  0  0  0
   -1.3599   -8.0929   -0.6968 O   0  0  0  0  0  0  0  0  0  0  0  0
   -2.1228   -8.7926    2.3470 O   0  0  0  0  0  0  0  0  0  0  0  0
   -2.9201   -6.6261    0.8209 C   0  0  0  0  0  0  0  0  0  0  0  0
   -2.7171   -5.6809   -0.0839 C   0  0  0  0  0  0  0  0  0  0  0  0
   -2.6894   -9.4424    1.4804 C   0  0  0  0  0  0  0  0  0  0  0  0
   -4.1551   -9.2237    1.2527 C   0  0  0  0  0  0  0  0  0  0  0  0
   -4.6211   -8.0091    1.9511 N   0  0  0  0  0  0  0  0  0  0  0  0
   -4.1441   -6.7926    1.5909 C   0  0  0  0  0  0  0  0  0  0  0  0
   -1.9732  -10.3349    0.7457 N   0  0  0  0  0  0  0  0  0  0  0  0
   -2.5352  -11.5438    0.1393 C   0  0  0  0  0  0  0  0  0  0  0  0
   -3.7382  -10.1454   -1.0313 C   0  0  0  0  0  0  0  0  0  0  0  0
   -4.4771   -9.0685   -0.2344 C   0  0  0  0  0  0  0  0  0  0  0  0
   -1.1597   -6.9600   -1.5692 C   0  0  0  0  0  0  0  0  0  0  0  0
   -0.3484   -8.9132   -0.4066 C   0  0  0  0  0  0  0  0  0  0  0  0
   -0.5266  -10.0316    0.5936 C   0  0  0  0  0  0  0  0  0  0  0  0
    0.1989  -11.2846    0.0935 C   0  0  0  0  0  0  0  0  0  0  0  0
    1.6855  -11.0375    0.0924 C   0  0  0  0  0  0  0  0  0  0  0  0
    2.4056  -11.1557    1.2668 C   0  0  0  0  0  0  0  0  0  0  0  0
    2.3280  -10.6987   -1.0841 C   0  0  0  0  0  0  0  0  0  0  0  0
    3.6907  -10.4722   -1.0878 C   0  0  0  0  0  0  0  0  0  0  0  0
    4.4146  -10.5849    0.0902 C   0  0  0  0  0  0  0  0  0  0  0  0
    3.7685  -10.9297    1.2685 C   0  0  0  0  0  0  0  0  0  0  0  0
    3.4000   -2.5774    2.0887 O   0  0  0  0  0  0  0  0  0  0  0  0
    0.8441   -4.5029    2.6983 C   0  0  0  0  0  0  0  0  0  0  0  0
    1.9977   -4.2225    3.6634 C   0  0  0  0  0  0  0  0  0  0  0  0
   -0.4569   -3.9507    3.2844 C   0  0  0  0  0  0  0  0  0  0  0  0
   -4.7722   -5.8002    1.9309 O   0  0  0  0  0  0  0  0  0  0  0  0
    0.7288   -8.7639   -0.9458 O   0  0  0  0  0  0  0  0  0  0  0  0
   -5.9845   -9.2198   -0.4484 C   0  0  0  0  0  0  0  0  0  0  0  0
    5.7554  -10.3629    0.0891 O   0  0  0  0  0  0  0  0  0  0  0  0
    4.0097   -0.0354    2.5388 C   0  0  0  0  0  0  0  0  0  0  0  0
    4.1773    1.4829    2.6261 C   0  0  0  0  0  0  0  0  0  0  0  0
    3.2479    2.0204    3.6229 N   0  0  0  0  0  0  0  0  0  0  0  0
    2.8383    3.3017    3.5405 C   0  0  0  0  0  0  0  0  0  0  0  0
    3.2391    4.0099    2.6411 O   0  0  0  0  0  0  0  0  0  0  0  0
    5.6134    1.8147    3.0366 C   0  0  0  0  0  0  0  0  0  0  0  0
    5.8131    3.3080    3.0035 C   0  0  0  0  0  0  0  0  0  0  0  0
    5.5610    4.0643    4.1329 C   0  0  0  0  0  0  0  0  0  0  0  0
    6.2537    3.9209    1.8455 C   0  0  0  0  0  0  0  0  0  0  0  0
    6.4369    5.2908    1.8151 C   0  0  0  0  0  0  0  0  0  0  0  0
    6.1789    6.0477    2.9426 C   0  0  0  0  0  0  0  0  0  0  0  0
    5.7440    5.4341    4.1025 C   0  0  0  0  0  0  0  0  0  0  0  0
    1.5854    5.2977    4.2492 C   0  0  0  0  0  0  0  0  0  0  0  0
    1.8823    3.8546    4.5658 C   0  0  0  0  0  0  0  0  0  0  0  0
    0.3445    5.7006    4.1315 C   0  0  0  0  0  0  0  0  0  0  0  0
   -0.7868    4.7678    4.4795 C   0  0  0  0  0  0  0  0  0  0  0  0
   -1.7165    5.4472    5.4870 C   0  0  0  0  0  0  0  0  0  0  0  0
   -2.8650    4.5001    5.8403 C   0  0  0  0  0  0  0  0  0  0  0  0
   -3.7947    5.1794    6.8478 C   0  0  0  0  0  0  0  0  0  0  0  0
   -4.9432    4.2324    7.2011 C   0  0  0  0  0  0  0  0  0  0  0  0
   -5.8729    4.9117    8.2086 C   0  0  0  0  0  0  0  0  0  0  0  0
    4.2878   -0.6193    3.8131 O   0  0  0  0  0  0  0  0  0  0  0  0
  2  3  1  0      
  3  1  1  0      
  4  5  2  0      
  5  6  1  0      
  6  2  1  0      
  7  8  1  0      
  8  5  1  0      
 11 12  2  0      
 12  7  1  0      
 10 13  2  0      
 13 14  1  0      
 14 15  1  0      
 15 16  1  0      
 16 11  1  0      
 13 17  1  0      
 17 18  1  0      
 19 20  1  0      
 21  9  1  0      
  9 22  1  0      
 22 23  1  0      
 23 17  1  0      
 24 25  1  0      
 25 26  1  0      
 25 27  2  0      
 27 28  1  0      
 28 29  2  0      
 29 30  1  0      
 30 26  2  0      
  3 31  2  0      
  6 32  1  0      
 32 33  1  0      
 32 34  1  0      
 16 35  2  0      
  7 21  1  0      
 22 36  2  0      
 23 24  1  0      
 14 20  1  0      
 20 37  1  0      
 29 38  1  0      
  1 39  1  0      
 39 40  1  0      
 40 41  1  0      
 41 42  1  0      
 42 43  2  0      
 44 45  1  0      
 45 46  1  0      
 45 47  2  0      
 47 48  1  0      
 48 49  2  0      
 49 50  1  0      
 50 46  2  0      
 51 52  1  0      
 52 42  1  0      
 51 53  2  0      
 53 54  1  0      
 54 55  1  0      
 55 56  1  0      
 56 57  1  0      
 57 58  1  0      
 58 59  1  0      
 39 60  1  0      
 40 44  1  0      
M  END
$$$$
