# Supplementary material for: Thalassospiramide G, a New γ-Amino-Acid-Bearing Peptide from the Marine Bacterium Thalassospira sp
Source: MDPI journal article supplement (doi:10.3390/md11030611), 2013-02-26
Supplement: s7 [file s7]

marinedrugs-11-00611-s003.mol
  ChemDraw03251423592D

 60 62  0  0  0  0  0  0  0  0999 V2000
   -2.5006    1.6500    0.0000 C   0  0  0  0  0  0  0  0  0  0  0  0
   -1.0717    1.6500    0.0000 N   0  0  0  0  0  0  0  0  0  0  0  0
   -1.7862    2.0625    0.0000 C   0  0  0  0  0  0  0  0  0  0  0  0
    0.3572    0.8250    0.0000 O   0  0  0  0  0  0  0  0  0  0  0  0
    0.3572    1.6500    0.0000 C   0  0  0  0  0  0  0  0  0  0  0  0
   -0.3572    2.0625    0.0000 C   0  0  0  0  0  0  0  0  0  0  0  0
    1.7862    1.6500    0.0000 C   0  0  0  0  0  0  0  0  0  0  0  0
    1.0717    2.0625    0.0000 N   0  0  0  0  0  0  0  0  0  0  0  0
    2.5006    0.4125    0.0000 O   0  0  0  0  0  0  0  0  0  0  0  0
    3.2151    0.8250    0.0000 O   0  0  0  0  0  0  0  0  0  0  0  0
    3.2151    1.6500    0.0000 C   0  0  0  0  0  0  0  0  0  0  0  0
    2.5006    2.0625    0.0000 C   0  0  0  0  0  0  0  0  0  0  0  0
    3.9296    0.4125    0.0000 C   0  0  0  0  0  0  0  0  0  0  0  0
    4.6441    0.8250    0.0000 C   0  0  0  0  0  0  0  0  0  0  0  0
    4.6441    1.6500    0.0000 N   0  0  0  0  0  0  0  0  0  0  0  0
    3.9296    2.0625    0.0000 C   0  0  0  0  0  0  0  0  0  0  0  0
    3.9296   -0.4125    0.0000 N   0  0  0  0  0  0  0  0  0  0  0  0
    4.6441   -0.8250    0.0000 C   0  0  0  0  0  0  0  0  0  0  0  0
    5.3585   -0.4125    0.0000 C   0  0  0  0  0  0  0  0  0  0  0  0
    5.3585    0.4125    0.0000 C   0  0  0  0  0  0  0  0  0  0  0  0
    1.7862    0.8250    0.0000 C   0  0  0  0  0  0  0  0  0  0  0  0
    2.5006   -0.4125    0.0000 C   0  0  0  0  0  0  0  0  0  0  0  0
    3.2151   -0.8250    0.0000 C   0  0  0  0  0  0  0  0  0  0  0  0
    3.2151   -1.6500    0.0000 C   0  0  0  0  0  0  0  0  0  0  0  0
    3.9296   -2.0625    0.0000 C   0  0  0  0  0  0  0  0  0  0  0  0
    4.6441   -1.6500    0.0000 C   0  0  0  0  0  0  0  0  0  0  0  0
    3.9296   -2.8875    0.0000 C   0  0  0  0  0  0  0  0  0  0  0  0
    4.6441   -3.3000    0.0000 C   0  0  0  0  0  0  0  0  0  0  0  0
    5.3585   -2.8875    0.0000 C   0  0  0  0  0  0  0  0  0  0  0  0
    5.3585   -2.0625    0.0000 C   0  0  0  0  0  0  0  0  0  0  0  0
   -1.7862    2.8875    0.0000 O   0  0  0  0  0  0  0  0  0  0  0  0
   -0.3572    2.8875    0.0000 C   0  0  0  0  0  0  0  0  0  0  0  0
   -1.0717    3.3000    0.0000 C   0  0  0  0  0  0  0  0  0  0  0  0
    0.3572    3.3000    0.0000 C   0  0  0  0  0  0  0  0  0  0  0  0
    3.9296    2.8875    0.0000 O   0  0  0  0  0  0  0  0  0  0  0  0
    1.7862   -0.8250    0.0000 O   0  0  0  0  0  0  0  0  0  0  0  0
    6.0730    0.8250    0.0000 C   0  0  0  0  0  0  0  0  0  0  0  0
    6.0730   -3.3000    0.0000 O   0  0  0  0  0  0  0  0  0  0  0  0
   -2.5006    0.8250    0.0000 C   0  0  0  0  0  0  0  0  0  0  0  0
   -3.2151    0.4125    0.0000 C   0  0  0  0  0  0  0  0  0  0  0  0
   -3.2151   -0.4125    0.0000 N   0  0  0  0  0  0  0  0  0  0  0  0
   -2.5006   -0.8250    0.0000 C   0  0  0  0  0  0  0  0  0  0  0  0
   -1.7862   -0.4125    0.0000 O   0  0  0  0  0  0  0  0  0  0  0  0
   -3.9296    0.8250    0.0000 C   0  0  0  0  0  0  0  0  0  0  0  0
   -4.6441    0.4125    0.0000 C   0  0  0  0  0  0  0  0  0  0  0  0
   -4.6441   -0.4125    0.0000 C   0  0  0  0  0  0  0  0  0  0  0  0
   -5.3585    0.8250    0.0000 C   0  0  0  0  0  0  0  0  0  0  0  0
   -6.0730    0.4125    0.0000 C   0  0  0  0  0  0  0  0  0  0  0  0
   -6.0730   -0.4125    0.0000 C   0  0  0  0  0  0  0  0  0  0  0  0
   -5.3585   -0.8250    0.0000 C   0  0  0  0  0  0  0  0  0  0  0  0
   -3.2151   -2.0625    0.0000 C   0  0  0  0  0  0  0  0  0  0  0  0
   -2.5006   -1.6500    0.0000 C   0  0  0  0  0  0  0  0  0  0  0  0
   -3.2151   -2.8875    0.0000 C   0  0  0  0  0  0  0  0  0  0  0  0
   -2.5006   -3.3000    0.0000 C   0  0  0  0  0  0  0  0  0  0  0  0
   -1.7862   -2.8875    0.0000 C   0  0  0  0  0  0  0  0  0  0  0  0
   -1.0717   -3.3000    0.0000 C   0  0  0  0  0  0  0  0  0  0  0  0
   -0.3572   -2.8875    0.0000 C   0  0  0  0  0  0  0  0  0  0  0  0
    0.3572   -3.3000    0.0000 C   0  0  0  0  0  0  0  0  0  0  0  0
    1.0717   -2.8875    0.0000 C   0  0  0  0  0  0  0  0  0  0  0  0
   -1.7862    0.4125    0.0000 O   0  0  0  0  0  0  0  0  0  0  0  0
  2  3  1  0      
  3  1  1  0      
  4  5  2  0      
  5  6  1  0      
  6  2  1  0      
  7  8  1  0      
  8  5  1  0      
 11 12  2  0      
 12  7  1  0      
 10 13  2  0      
 13 14  1  0      
 14 15  1  0      
 15 16  1  0      
 16 11  1  0      
 13 17  1  0      
 17 18  1  0      
 19 20  1  0      
 21  9  1  0      
  9 22  1  0      
 22 23  1  0      
 23 17  1  0      
 24 25  1  0      
 25 26  1  0      
 25 27  2  0      
 27 28  1  0      
 28 29  2  0      
 29 30  1  0      
 30 26  2  0      
  3 31  2  0      
  6 32  1  1      
 32 33  1  0      
 32 34  1  0      
 16 35  2  0      
  7 21  1  6      
 22 36  2  0      
 23 24  1  1      
 14 20  1  1      
 20 37  1  0      
 29 38  1  0      
  1 39  1  0      
 39 40  1  0      
 40 41  1  0      
 41 42  1  0      
 42 43  2  0      
 44 45  1  0      
 45 46  1  0      
 45 47  2  0      
 47 48  1  0      
 48 49  2  0      
 49 50  1  0      
 50 46  2  0      
 51 52  1  0      
 52 42  1  0      
 51 53  2  0      
 53 54  1  0      
 54 55  1  0      
 55 56  1  0      
 56 57  1  0      
 57 58  1  0      
 58 59  1  0      
 39 60  1  6      
 40 44  1  1      
M  END
